# Supplementary material for: Piezoelectric Ba and Ti co-doped BiFeO3 textured films: selective growth of solid solutions or nanocomposites
Source: Royal Society of Chemistry journal article supplement (doi:10.1039/d0tc03930f), 2020-01-01
Supplement: d0tc03930f1.pdf [file d0tc03930f1.pdf]

## Electronic Supporting Information

### Piezoelectric Ba and Ti co-doped BiFeO<sub>3</sub> textured films: selective growth of solid solutions or nanocomposites

Quentin Micard,<sup>a</sup> Anna L. Pellegrino<sup>a</sup> Raffaella Lo Nigro,<sup>b</sup> Ausrine Bartasyte,<sup>c</sup> Guglielmo G. Condorelli,<sup>a,\*</sup> and Graziella Malandrino<sup>a,\*</sup>

<sup>a</sup>Dipartimento di Scienze Chimiche, Universita' Catania, and INSTM Udr Catania, Viale A. Doria 6, I-95125 Catania, Italy

<sup>b</sup>Istituto per la Microelettronica e Microsistemi, IMM-CNR, Strada VIII n 5, 95121 Catania, Italy

<sup>c</sup>FEMTO-ST Institute, University of Bourgogne Franche-Comté CNRS UMR 6174, 26 Rue de l'Épitaphe, F-25030 Besançon, France.

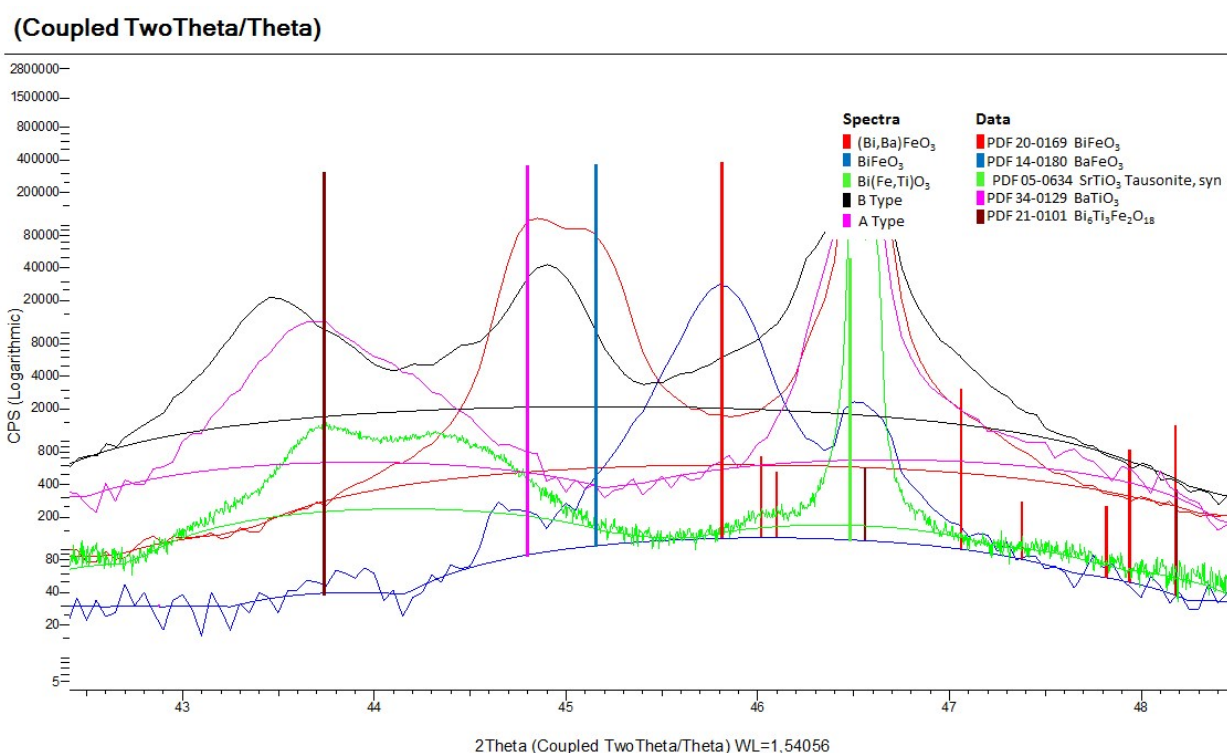

**Fig. S1** Raw XRD patterns with indicated the peak positions of potential phases. For the films and peak position phase see the legend in the figure.

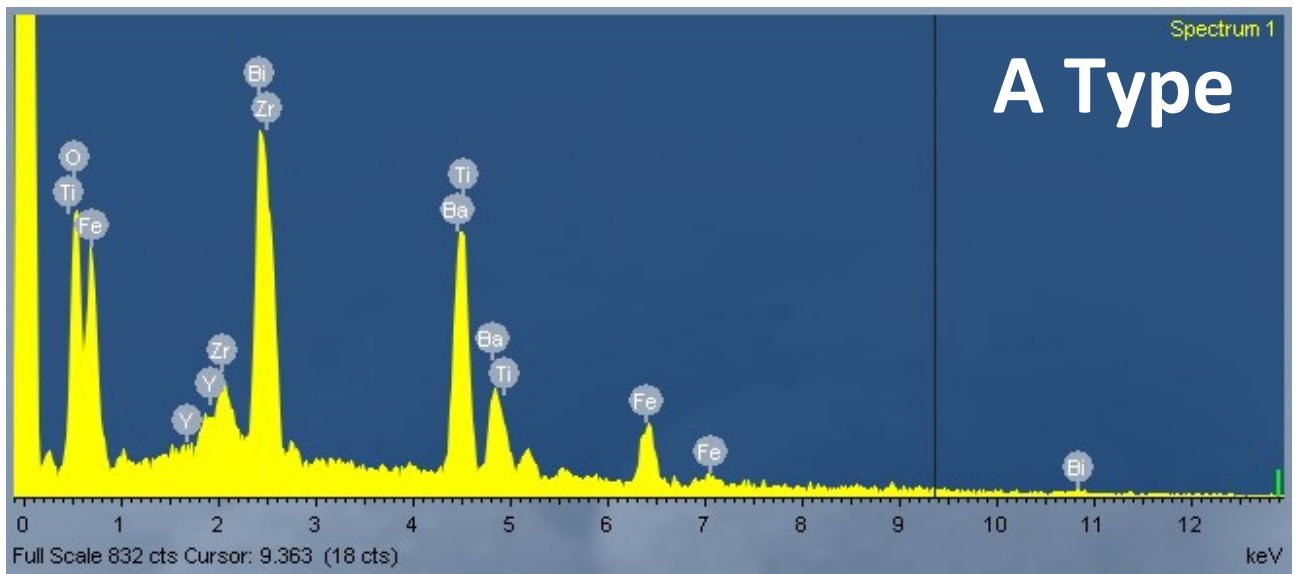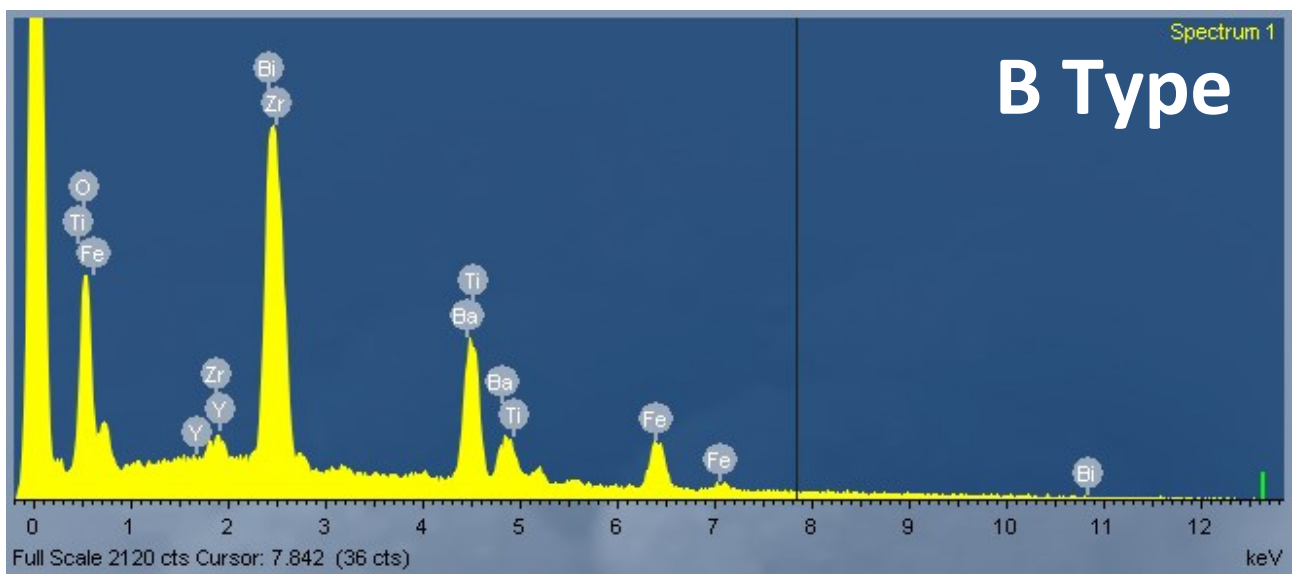

**Fig. S2** EDX spectra of the A-type and B-type films.

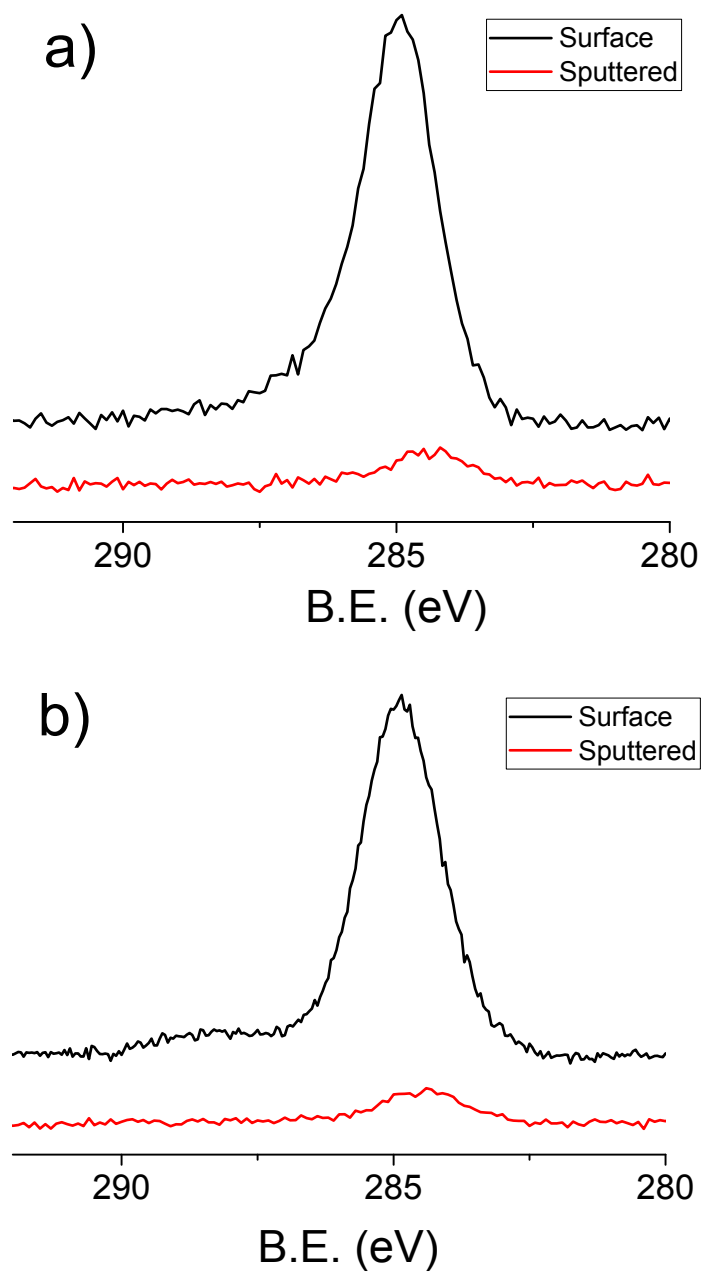

**Fig. S3** C 1s XPS spectral region of a) A-type and b) B-type samples.

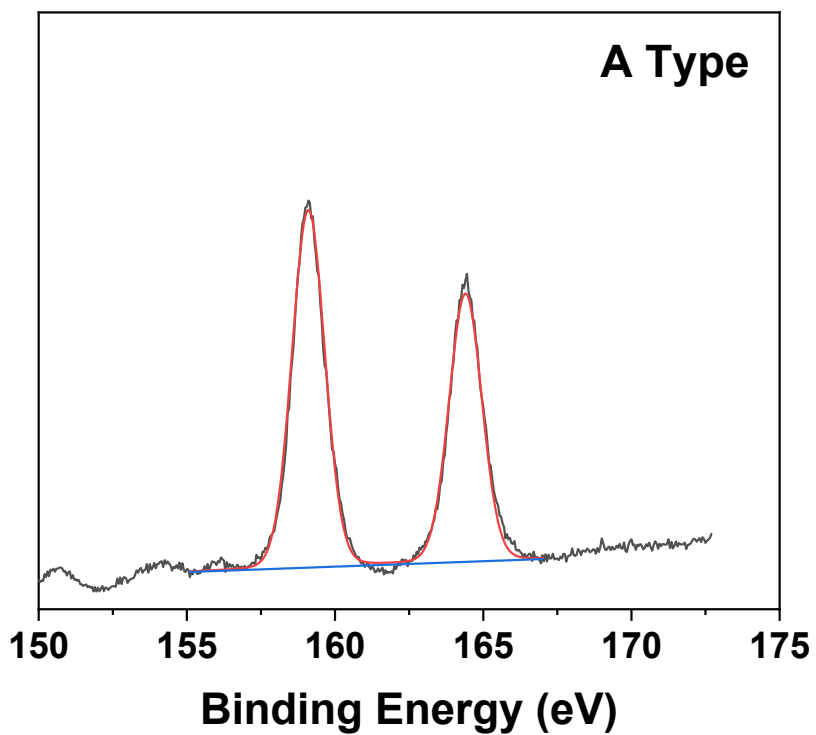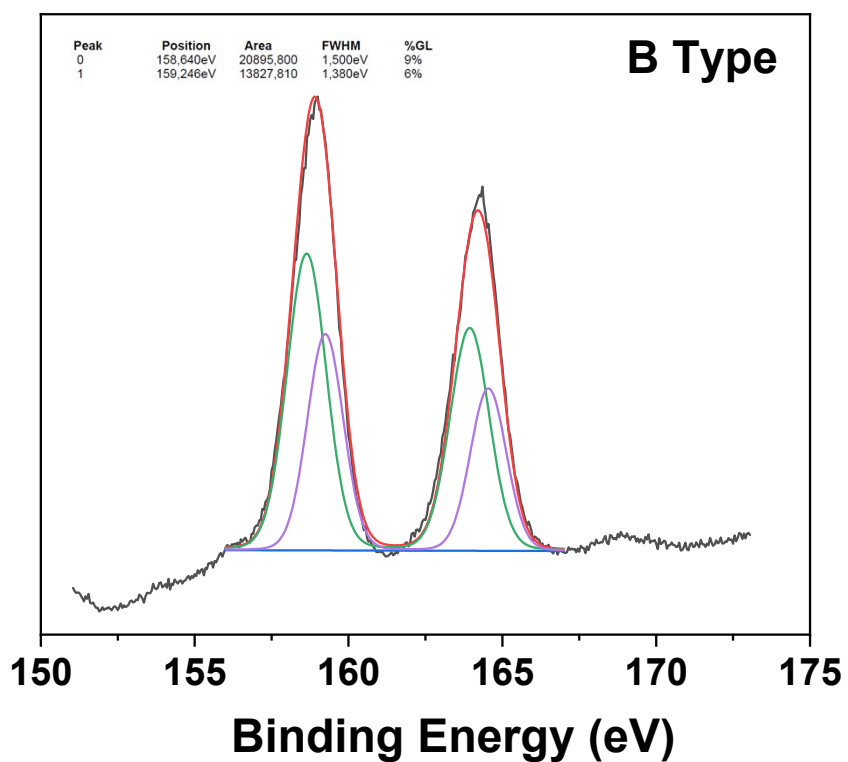

**Fig. S4** Deconvolution of the Bi 4f<sub>7/2</sub> XPS spectral region of a) A-type and b) B-type samples.

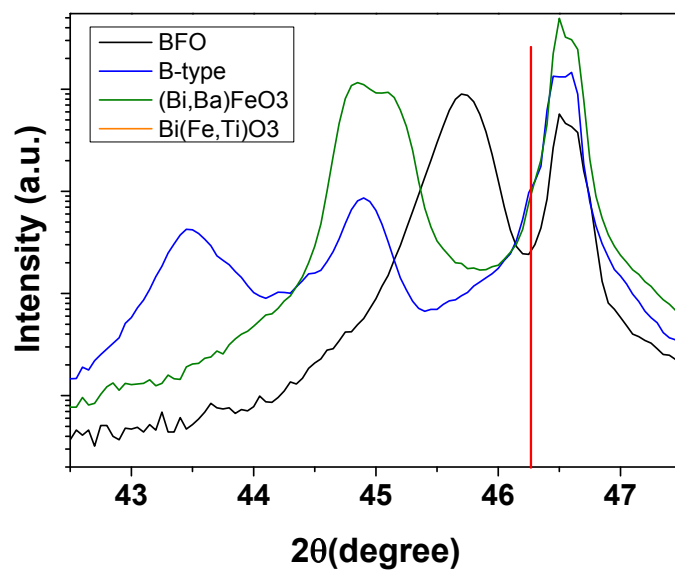

**Fig. S5** XRD patterns in the 42-48° range of the B-type sample (—) compared with undoped  $\text{BiFeO}_3$  (—), and singly doped  $\text{Bi}_{(1-x)}\text{Ba}_x\text{FeO}_3$  (—) films grown on  $\text{SrTiO}_3:\text{Nb}$  (100) substrates.
